# Supplementary material for: Monocot and dicot MLO powdery mildew susceptibility factors are functionally conserved in spite of the evolution of class-specific molecular features
Source: PubMed Central journal article supplement (PMC4620714; doi:10.1186/s12870-015-0639-6), 2015-10-26

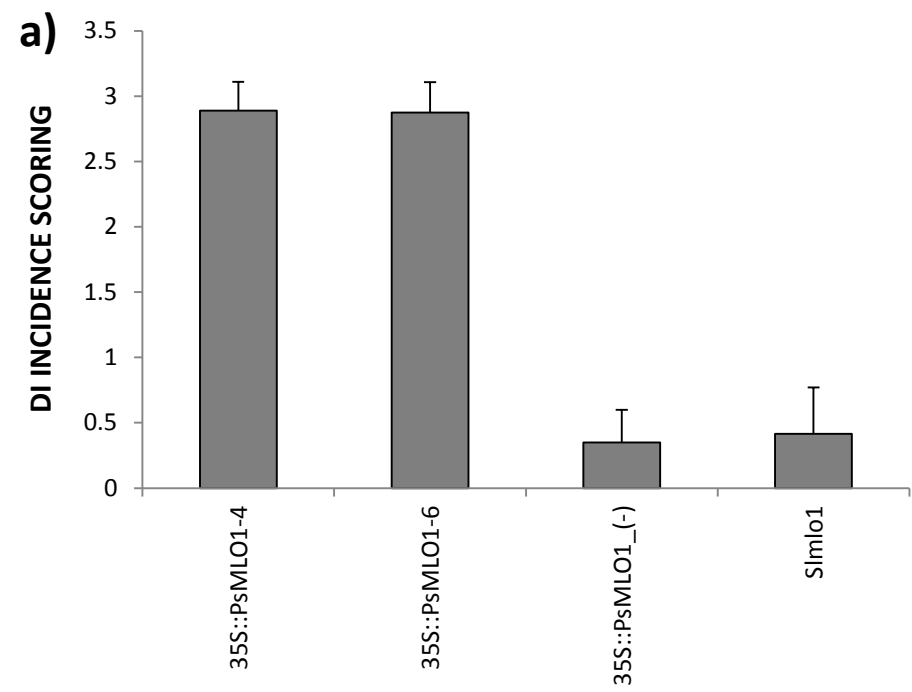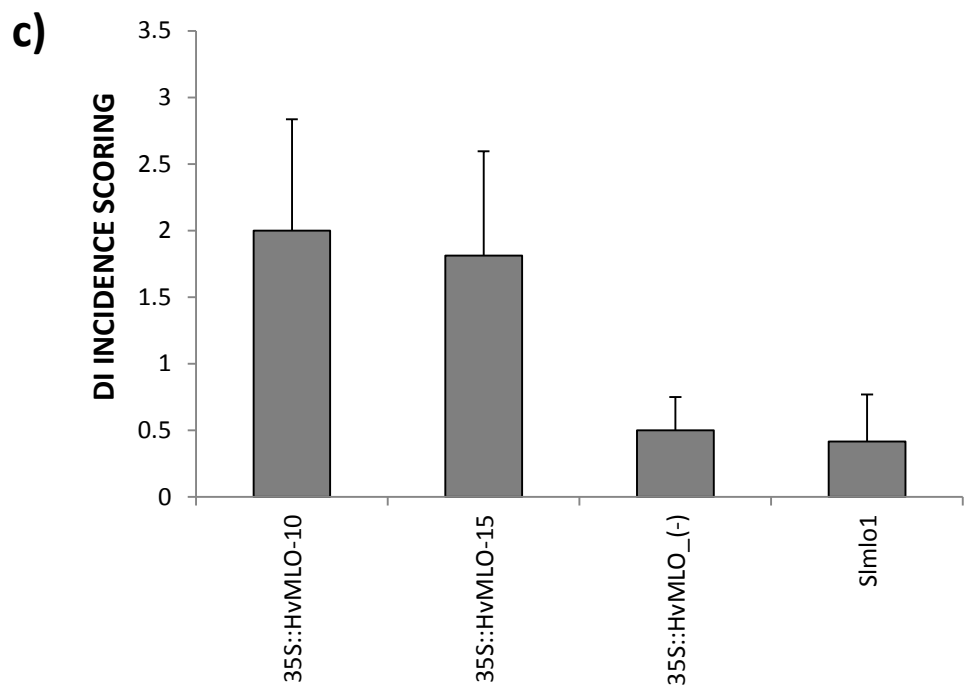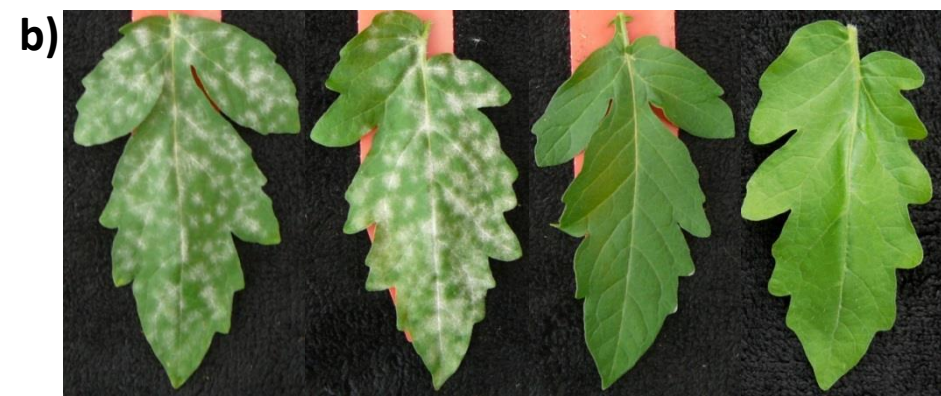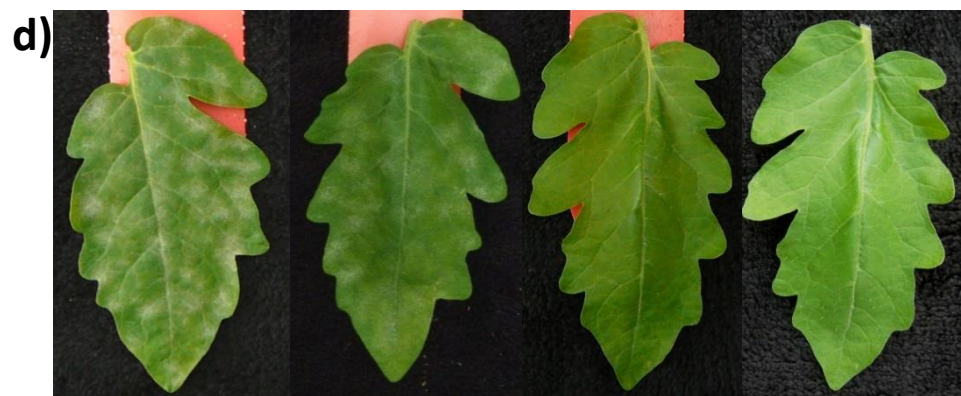

Supplement: 12870_2015_639_MOESM3_ESM.pdf [file 12870_2015_639_MOESM3_ESM.pdf]
